# Supplementary material for: Bifunctional Pt–Mo catalyst for in situ hydrogenation of methyl stearate into alkanes using formic acid as a hydrogen donor
Source: Royal Society of Chemistry journal article supplement (doi:10.1039/d1nj02747f), 2021-01-01
Supplement: d1nj02747f1.pdf [file d1nj02747f1.pdf]

This journal is © The Royal Society of Chemistry and the Centre National de la Recherche Scientifique 2021

# Bifunctional Pt-Mo catalyst for in-situ hydrogenation of methyl stearate into alkanes using formic acid as a hydrogen donor

Wei Yang,<sup>a</sup> Kejing Wu,<sup>\*b</sup> Yingming Zhu,<sup>b</sup> Yingying Liu,<sup>b</sup> Houfang Lu,<sup>a, b</sup> and Bin Liang<sup>a, b</sup>

<sup>a</sup> School of Chemical Engineering, Sichuan University, Chengdu 610065, China

<sup>b</sup> Institute of New Energy and Low-Carbon Technology, Sichuan University, Chengdu 610207, China

\* Corresponding Author. E-mail: wukj@scu.edu.cn, Tel.: +86 28 85999978

### **Preparation of Pt/Mo/AC**

Pt/Mo/AC was obtained using the wet impregnation method. Firstly, Mo/AC was prepared by synthesis method of Pt-Mo/AC. Then, appropriate amounts of  $\text{H}_2\text{PtCl}_6 \cdot 6\text{H}_2\text{O}$  were deposited on the Mo/AC support to obtain the precursor  $\text{H}_2\text{PtCl}_6 \cdot 6\text{H}_2\text{O}/\text{Mo}/\text{AC}$ , which was loaded in quartz tube and calcined under the same calcination conditions as Pt-Mo/AC.

### **Gas analysis method**

Reactor headspace gas were collected using 0.5 L Restek Tedlar sample bags. The quantitative analysis of  $\text{CH}_4$  and  $\text{H}_2$  was performed using Shimadzu GC-2014C TCD gas chromatograph outfitted with TDX-01 (3 m×3 mm (ID)) and Porapak Q 60/80 mesh, respectively.  $\text{CH}_4$  analysis conditions:  $\text{N}_2$  was carrier gas, inlet temperature was 100 °C, an isothermal oven temperature profile was 50 °C. The TCD detector temperature was 200 °C, and the reference gas and auxiliary gas flow were both 20 mL min<sup>-1</sup>.  $\text{H}_2$  analysis conditions: Ar was carrier gas, and the oven temperature was firstly maintained at 30 °C for 3 min, then heated to 150 °C at 20 °C/min for 1 min. The other parameters were the same as the  $\text{CH}_4$  analysis conditions.

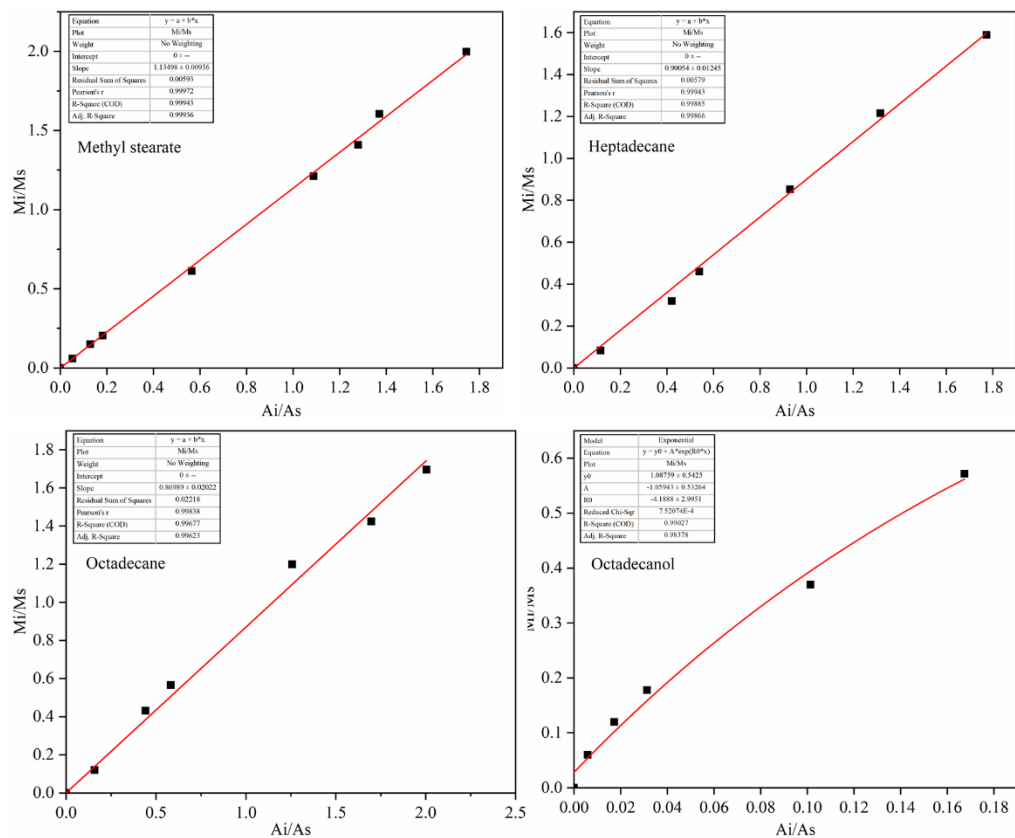

Figure S1. The calibration curves of different substances.  $M$  and  $A$  refers to mass and area, respectively, and subscript  $i$  and  $s$  refer to certain substance and internal standard.

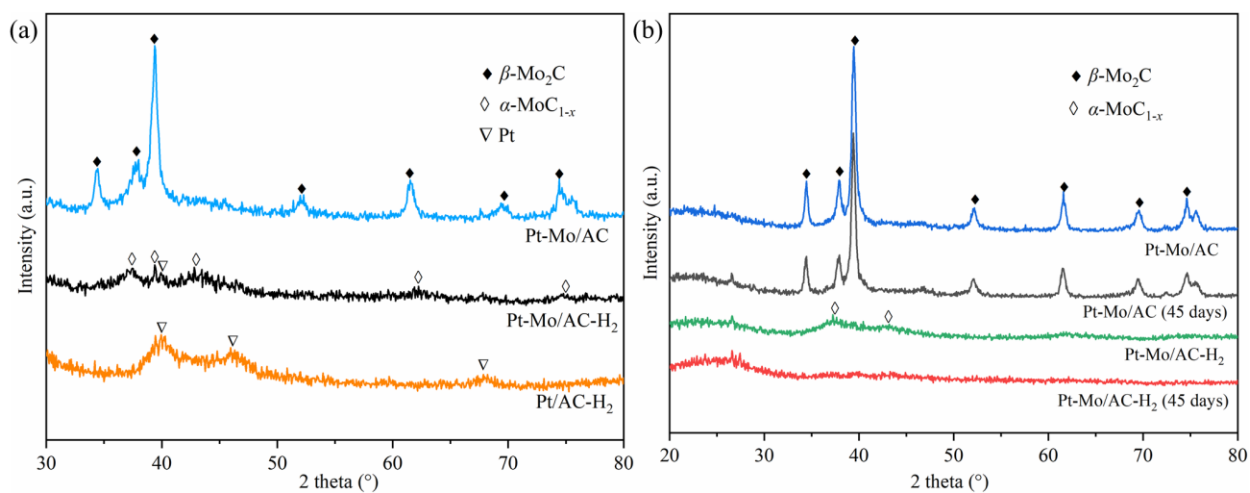

Figure S2. (a) XRD patterns of Pt-Mo/AC, Pt-Mo/AC-H<sub>2</sub> and Pt/AC-H<sub>2</sub> (b) XRD patterns of catalysts. Pt-Mo/AC (45 days) and Pt-Mo/AC-H<sub>2</sub> (45 days) were left in the air for 45 days

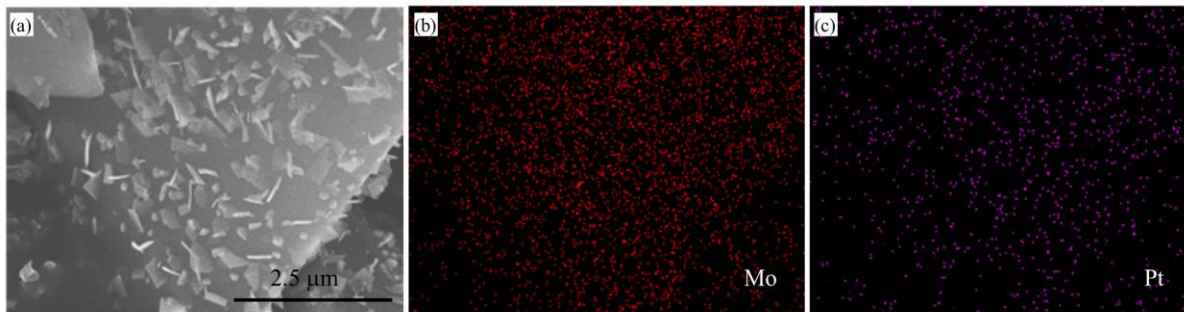

Figure S3. SEM images and EDS mapping of Pt-Mo/AC

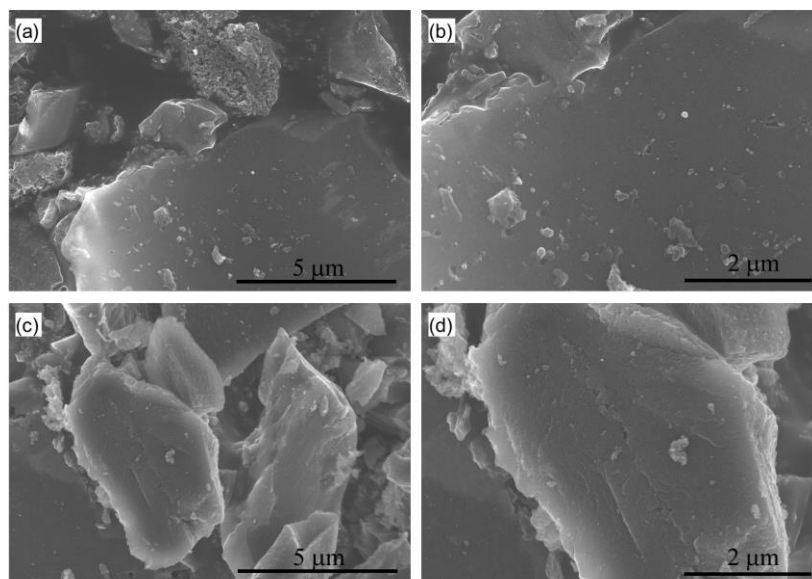

Figure S4. SEM images of Pt-Mo/AC-H<sub>2</sub> (a, b) and AC (c, d)

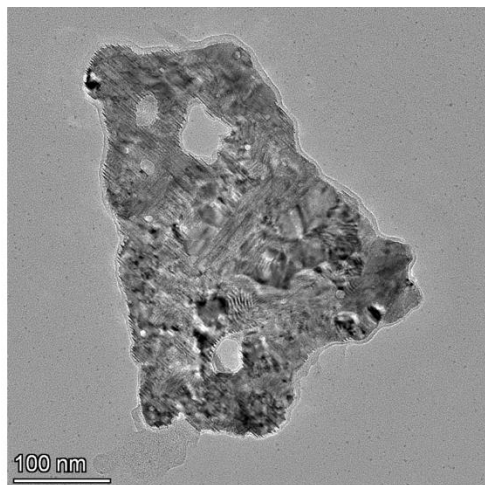

Figure S5 TEM image of Pt-Mo/AC

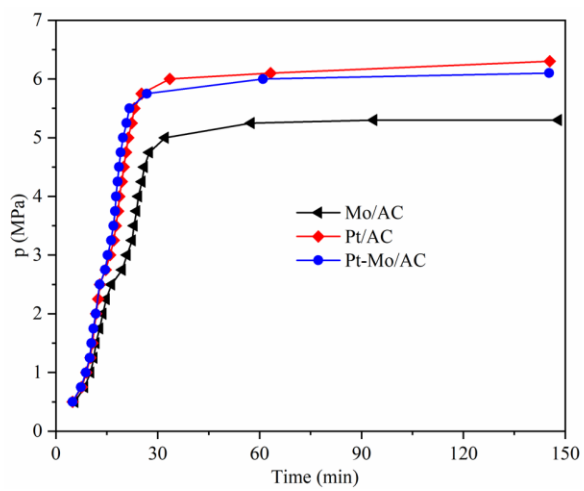

Figure S6. FA decomposition of Mo/AC, Pt/AC and Pt-Mo/AC

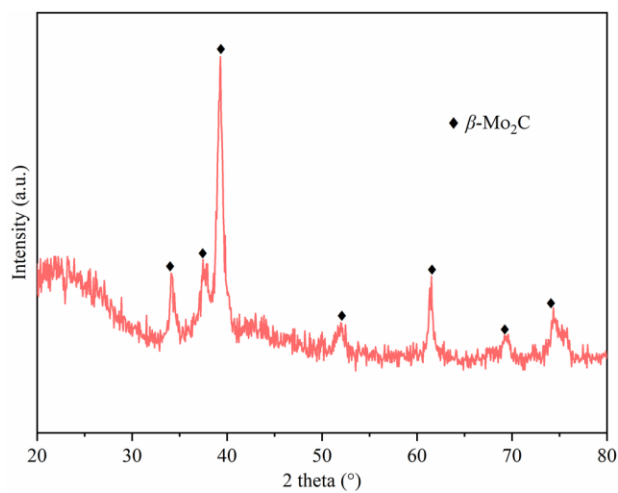

Figure S7. XRD patterns of Pt/Mo/AC

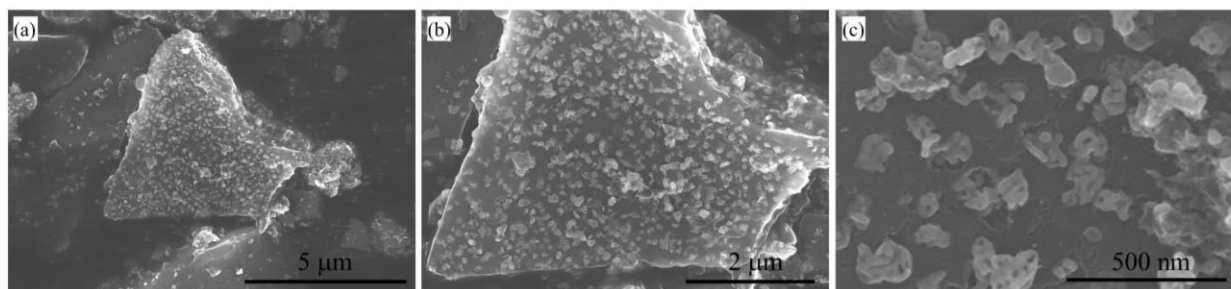

Figure S8. SEM images of Pt/Mo/AC (a-c)

Table S1. Control experiments of in-situ hydrogenation of methyl stearate on different catalysts <sup>a</sup>

| Entry | Catalysts             | Conv. (%) | Yield (%)   |            |                     |                     |
|-------|-----------------------|-----------|-------------|------------|---------------------|---------------------|
|       |                       |           | Heptadecane | Octadecane | Paraffins (C15-C16) | Others <sup>b</sup> |
| 1     | none                  | 7.4       | 0           | 0          | 0                   | 0                   |
| 2     | AC                    | 57.0      | 3.0         | 0.6        | 0                   | 4.2                 |
| 3     | Pt-Mo/AC <sup>c</sup> | 85.9      | 41.3        | 34.7       | 0.4                 | 0                   |

<sup>a</sup> Reaction conditions: 0.67 mmol methyl stearate, FA/methyl stearate ratio of 38.9, 200 mg catalyst, 20 ml hexane, 290 °C, 2 h. <sup>b</sup> Total yield of hexadecanol, heptadecanol, octadecanol and octadecanal. <sup>c</sup> Reaction conditions: 0.2 MPa H<sub>2</sub>

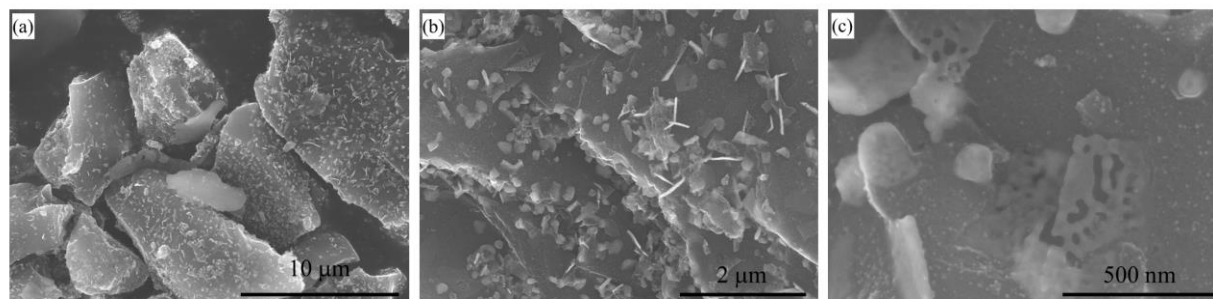

Figure S9. SEM image of used Pt-Mo/AC

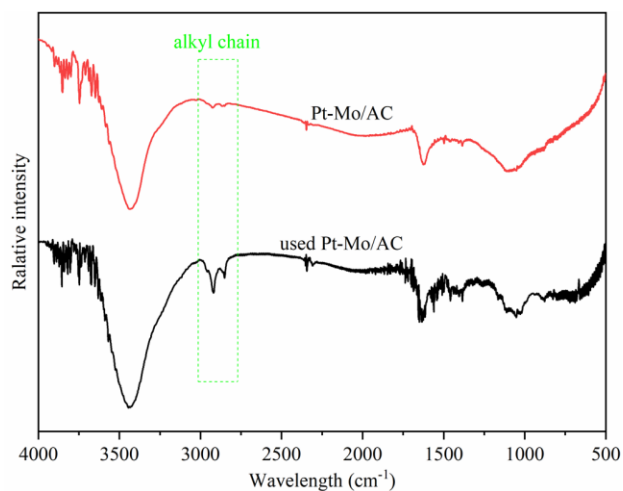

Figure S10. FTIR spectra of Pt-Mo/AC and used Pt-Mo/AC

Table S2. ICP-OES results of the catalysts

| Entry | Catalysts       | Pt Theoretical loading<br>(wt.%) | Actual loading (wt.%) |       |
|-------|-----------------|----------------------------------|-----------------------|-------|
|       |                 |                                  | Pt                    | Mo    |
| 1     |                 | 0                                | 0                     | 9.3   |
| 2     |                 | 0.2                              | 0.05                  | 7.79  |
| 3     | Pt-Mo/AC        | 0.5                              | 0.17                  | 9.04  |
| 4     |                 | 1                                | 0.45                  | 10.03 |
| 5     |                 | 1.5                              | 0.73                  | 9.12  |
| 6     | Reused Pt-Mo/AC | 1                                | 0.29                  | 7.23  |



Table S3. In-situ hydrogenation of various feedstock over Pt-Mo/AC

| Entry | Feedstock      | Yield (%)   |            |                     |        |
|-------|----------------|-------------|------------|---------------------|--------|
|       |                | Heptadecane | Octadecane | Paraffins (C15-C16) | Others |
| 1     | Stearic acid   | 70.0        | 9.3        | 1.1                 | 4.1    |
| 2     | Oleic acid     | 50.9        | 7.6        | 7.4                 | 0      |
| 3     | Ethyl stearate | 33.1        | 9.8        | 0.3                 | 2.3    |
| 4     | Corn oil       | 14.0        | 1.9        | 2.8                 | 4.5    |
| 5     | Biodiesel      | 16.6        | 6.1        | 4.5                 | 0      |

Reaction conditions: 200 mg feedstock , FA/methyl stearate ratio of 3.9, 200 mg catalyst, 20 ml hexane, 290 °C, 2 h
